# Supplementary material for: Coordination polymers of a multipyridyl and pyrazolyl ligand with conformational flexibility: syntheses, structures and luminescence
Source: Royal Society of Chemistry journal article supplement (doi:10.1039/c3ce42147c), 2013-11-20
Supplement: c3ce42147c.pdf [file c3ce42147c.pdf]

## Supporting Information

# Coordination Polymers of a Multipyridyl and Pyrazolyl Ligand with Conformational Flexibility: Syntheses, Structures and Luminescence

Caixia Ding, Xing Rui, Cheng Wang and Yongshu Xie

Key Laboratory for Advanced Materials and Institute of Fine Chemicals, East China University of Science &  
Technology, Shanghai 200237, P. R. China

**\*Corresponding Author: *Yongshu Xie***

**Telephone number: (86)-21-64250772**

**E-mail address: [yshxie@ecust.edu.cn](mailto:yshxie@ecust.edu.cn)**

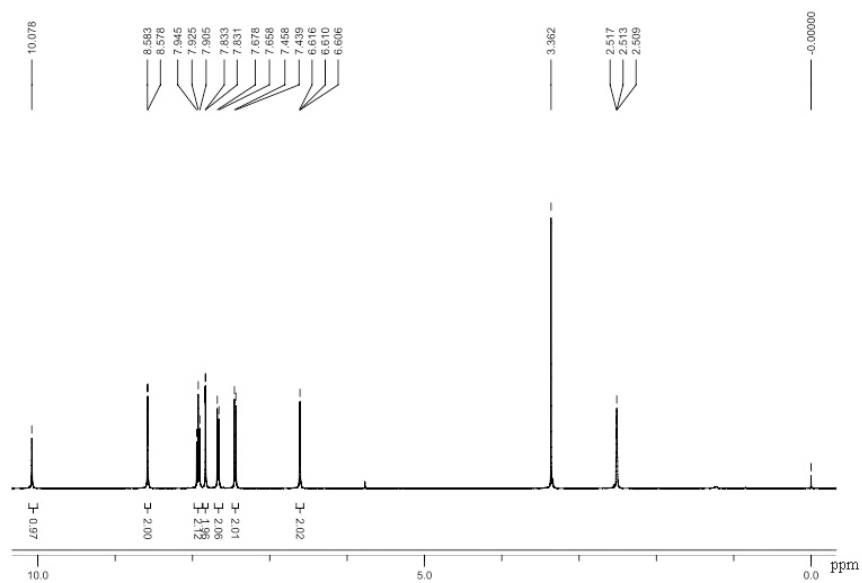

Fig. S1. The <sup>1</sup>H NMR spectrum of **D2** in DMSO-*d*<sub>6</sub>

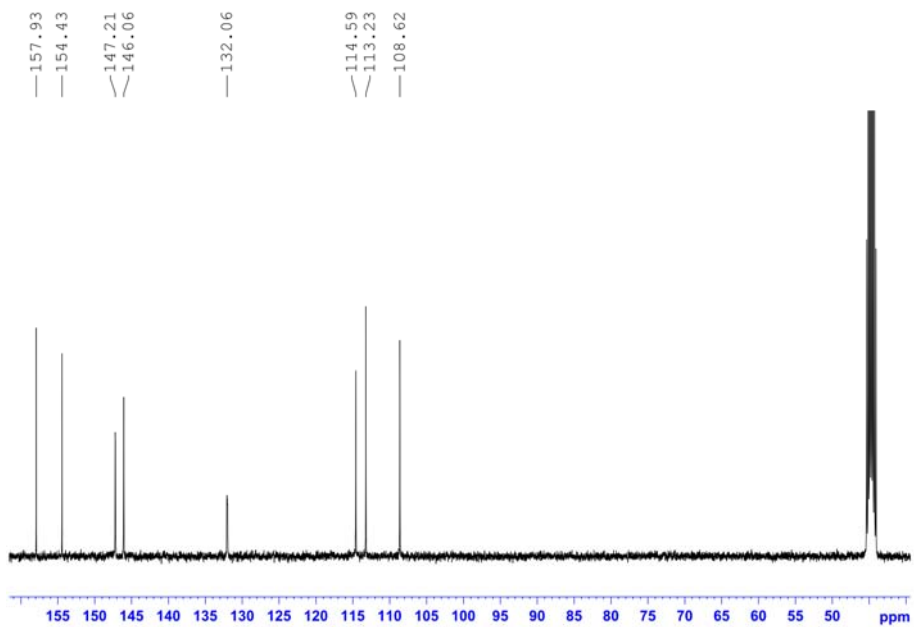

Fig. S2. The <sup>13</sup>C NMR spectrum of **D2** in DMSO-*d*<sub>6</sub>

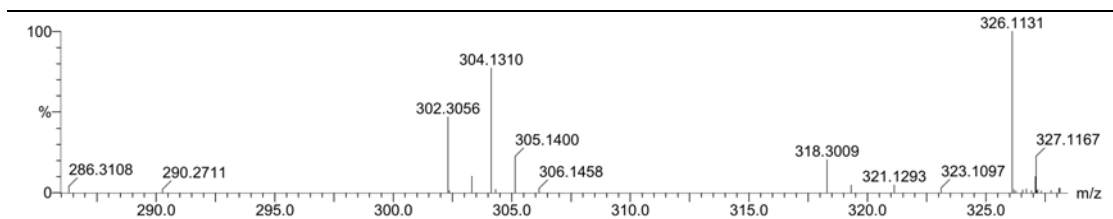

Fig. S3. HRMS of **D2** in MeOH

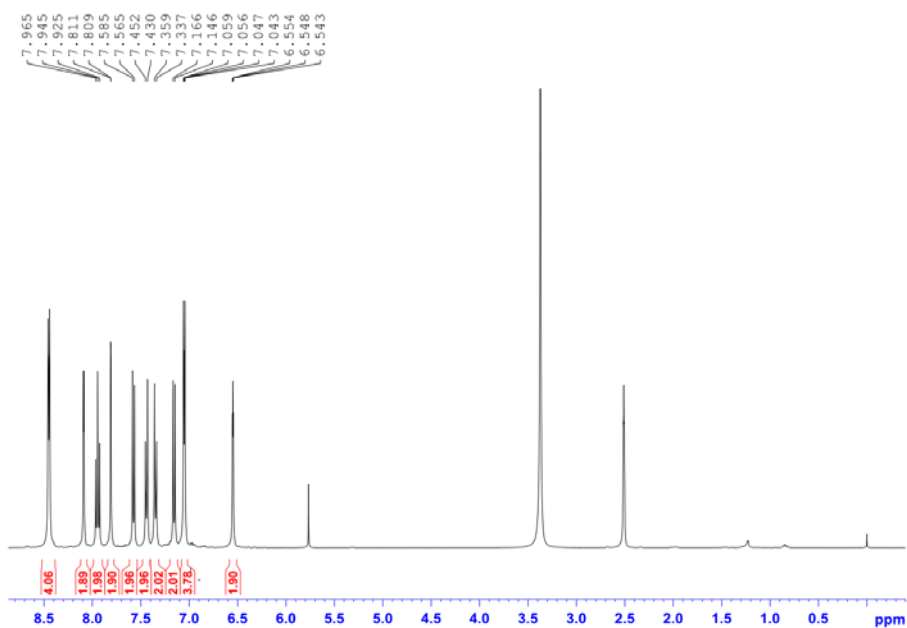

Fig. S4. The  $^1\text{H}$  NMR spectrum of **L** in  $\text{DMSO-}d_6$

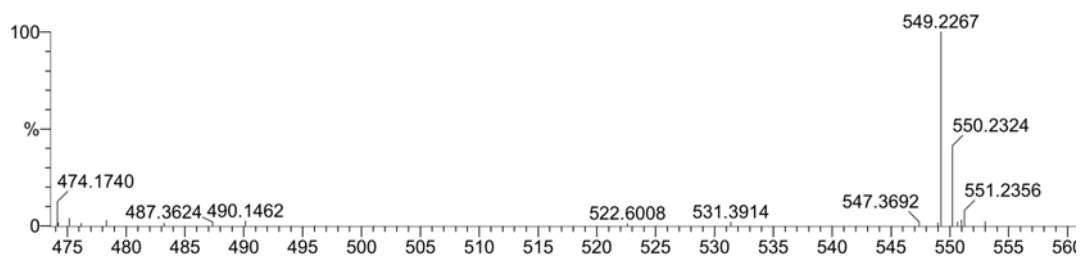

Fig. S5. HRMS of **L** in MeOH

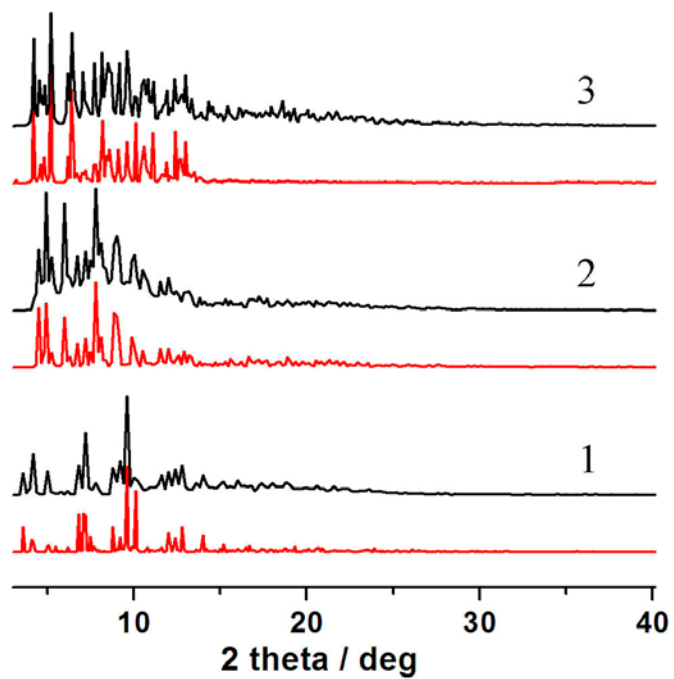

Fig. S6. Stimulated (red) and experimental (black) XRPD patterns of complexes **1-3**.

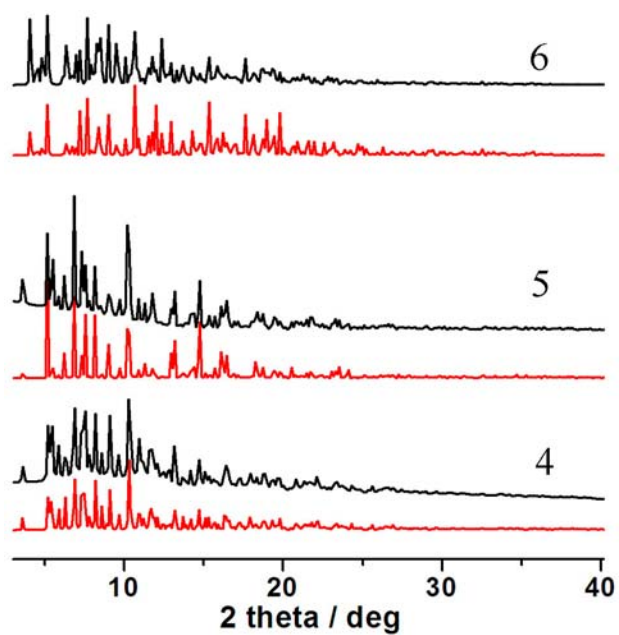

Fig. S7. Stimulated (red) and experimental (black) XRPD patterns of complexes **4-6**.

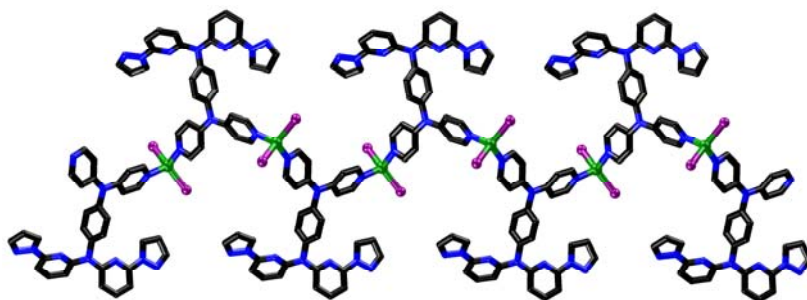

Fig. S8. 1D zigzag chain of complex 3.

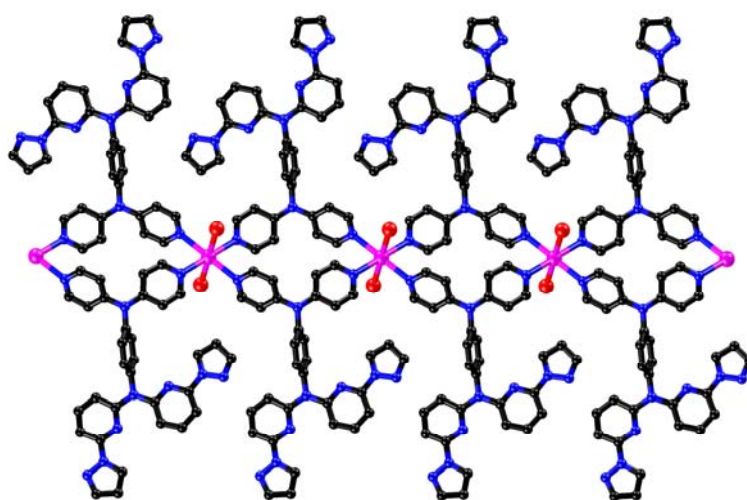

Fig. S9. 1D chain of complex 5.

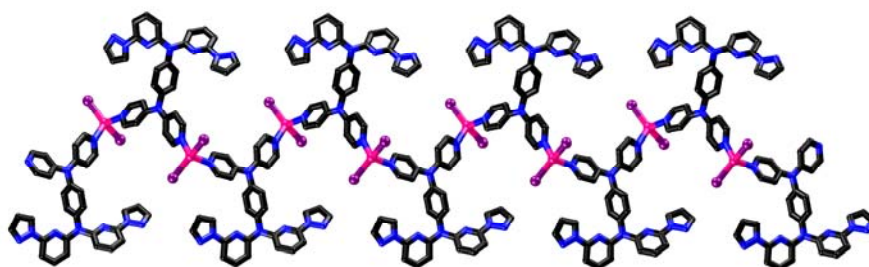

Fig. S10. 1D chain of complex 6.

Table S1. Selected Bond lengths (Å) and Angles (°) for complexes 1~ 8.

Complex 1

|             |           |                   |          |                   |            |
|-------------|-----------|-------------------|----------|-------------------|------------|
| Zn(1)-N(9)  | 2.019(9)  | N(9)-Zn(1)-N(10)  | 109.6(4) | N(9)-Zn(1)-Cl(2)  | 102.9(3)   |
| Zn(1)-N(10) | 2.035(10) | N(9)-Zn(1)-Cl(1)  | 109.6(3) | N(10)-Zn(1)-Cl(2) | 102.0(3)   |
| Zn(1)-Cl(1) | 2.208(3)  | N(10)-Zn(1)-Cl(1) | 108.9(3) | Cl(1)-Zn(1)-Cl(2) | 123.13(16) |
| Zn(1)-Cl(2) | 2.246(4)  |                   |          |                   |            |

Complex 2

|               |            |                     |          |                     |           |
|---------------|------------|---------------------|----------|---------------------|-----------|
| Zn(1)-N(10)#1 | 2.031(9)   | N(10)#1-Zn(1)-N(9)  | 108.0(4) | N(10)#1-Zn(1)-Br(2) | 108.2(3)  |
| Zn(1)-N(9)    | 2.037(8)   | N(10)#1-Zn(1)-Br(1) | 108.6(3) | N(9)-Zn(1)-Br(2)    | 104.7(3)  |
| Zn(1)-Br(1)   | 2.367(2)   | N(9)-Zn(1)-Br(1)    | 103.6(2) | Br(1)-Zn(1)-Br(2)   | 122.92(8) |
| Zn(1)-Br(2)   | 2.3699(18) |                     |          |                     |           |

Symmetry transformations used to generate equivalent atoms: #1 -x+3/2, y+1/2, -z+3/2

Complex 3

|               |            |                    |          |                    |           |
|---------------|------------|--------------------|----------|--------------------|-----------|
| Zn(1)-N(10)#1 | 2.055(8)   | N(10)#1-Zn(1)-N(9) | 100.0(3) | N(10)#1-Zn(1)-I(1) | 109.7(3)  |
| Zn(1)-N(9)    | 2.067(8)   | N(10)#1-Zn(1)-I(2) | 110.1(2) | N(9)-Zn(1)-I(1)    | 104.3(3)  |
| Zn(1)-I(2)    | 2.5362(16) | N(9)-Zn(1)-I(2)    | 109.7(2) | I(2)-Zn(1)-I(1)    | 120.83(6) |
| Zn(1)-I(1)    | 2.5583(18) |                    |          |                    |           |

Symmetry transformations used to generate equivalent atoms: #1 -x+1/2, y-1/2, -z+1/2

Complex 4

|                       |            |                       |           |                     |           |
|-----------------------|------------|-----------------------|-----------|---------------------|-----------|
| Cd(1)-N(10)#1         | 2.436(5)   | N(10)#1-Cd(1)-N(9)    | 96.55(18) | N(10)#1-Cd(1)-Cl(1) | 90.05(14) |
| Cd(1)-N(9)            | 2.499(6)   | N(10)#2-Cd(1)-N(9)    | 83.45(18) | N(9)-Cd(1)-Cl(1)    | 89.19(16) |
| Cd(1)-Cl(1)           | 2.532(3)   | N(9)-Cd(1)-N(9)#3     | 180.0(2)  | N(9)#3-Cd(1)-Cl(1)  | 90.81(16) |
| N(10)#1-Cd(1)-N(10)#2 | 180.00(18) | N(10)#1-Cd(1)-Cl(1)#3 | 89.95(14) | Cl(1)#3-Cd(1)-Cl(1) | 180.0     |

Symmetry transformations used to generate equivalent atoms: #1 x, y, z-1 #2 -x+3, -y+1, -z+1 #3 -x+3, -y+1, -z

Complex 5

|                    |           |                      |           |                       |           |
|--------------------|-----------|----------------------|-----------|-----------------------|-----------|
| Cd(1)-N(9)         | 2.487(4)  | N(9)#1-Cd(1)-N(10)#2 | 95.82(15) | N(10)#2-Cd(1)-Br(1)#1 | 90.84(11) |
| Cd(1)-N(10)#2      | 2.496(5)  | N(9)-Cd(1)-Br(1)#1   | 89.75(10) | N(10)#3-Cd(1)-Br(1)#1 | 89.16(11) |
| Cd(1)-Br(1)        | 2.6646(6) | N(9)#1-Cd(1)-Br(1)#1 | 90.25(10) | N(9)-Cd(1)-Br(1)      | 90.25(10) |
| N(9)-Cd(1)-N(10)#2 | 84.18(15) |                      |           |                       |           |

Symmetry transformations used to generate equivalent atoms: #1 -x+1, -y+1, -z+3 #2 -x, -y+1, -z+2 #3 x+1, y, z+1

Complex 6

|               |          |                    |            |                    |            |
|---------------|----------|--------------------|------------|--------------------|------------|
| Cd(1)-N(10)#1 | 2.270(5) | N(10)#1-Cd(1)-N(9) | 93.87(19)  | N(10)#1-Cd(1)-I(1) | 106.08(14) |
| Cd(1)-N(9)    | 2.301(5) | N(10)#1-Cd(1)-I(2) | 111.83(15) | N(9)-Cd(1)-I(1)    | 103.82(14) |

---

|            |           |                 |            |                 |           |
|------------|-----------|-----------------|------------|-----------------|-----------|
| Cd(1)-I(2) | 2.6708(9) | N(9)-Cd(1)-I(2) | 107.62(14) | I(2)-Cd(1)-I(1) | 128.01(3) |
| Cd(1)-I(1) | 2.7038(8) |                 |            |                 |           |

Symmetry transformations used to generate equivalent atoms: #1 -x+3/2, y-1/2, -z+3/2

Complex 7

|                 |            |                  |            |                  |            |
|-----------------|------------|------------------|------------|------------------|------------|
| Co(1)-N(5)      | 2.085(4)   | N(8)-Co(1)-N(11) | 92.89(16)  | N(8)-Co(1)-N(9)  | 84.92(14)  |
| Co(1)-N(8)      | 2.094(4)   | N(6)-Co(1)-N(11) | 92.01(16)  | N(6)-Co(1)-N(9)  | 88.18(14)  |
| Co(1)-N(6)      | 2.100(4)   | N(5)-Co(1)-N(3)  | 79.49(14)  | N(11)-Co(1)-N(9) | 177.72(15) |
| Co(1)-N(11)     | 2.103(5)   | N(8)-Co(1)-N(3)  | 168.21(15) | N(3)-Co(1)-N(9)  | 93.06(13)  |
| Co(1)-N(3)      | 2.105(3)   | N(6)-Co(1)-N(3)  | 88.97(14)  | N(5)-Co(1)-N(6)  | 167.32(14) |
| Co(1)-N(9)      | 2.244(4)   | N(11)-Co(1)-N(3) | 89.22(15)  | N(8)-Co(1)-N(6)  | 79.37(15)  |
| N(5)-Co(1)-N(8) | 111.96(15) | N(5)-Co(1)-N(9)  | 87.23(14)  | N(5)-Co(1)-N(11) | 93.04(16)  |

Complex 8

|                  |           |                    |            |                   |           |
|------------------|-----------|--------------------|------------|-------------------|-----------|
| Cu(1)-N(3)       | 1.971(3)  | N(3)-Cu(1)-N(2)    | 173.39(13) | N(3)-Cu(1)-N(8)#1 | 88.91(13) |
| Cu(1)-N(2)       | 1.972(3)  | N(3)-Cu(1)-N(4)    | 82.56(12)  | N(2)-Cu(1)-N(8)#1 | 88.92(13) |
| Cu(1)-N(4)       | 1.978(3)  | N(2)-Cu(1)-N(4)    | 91.45(12)  | N(4)-Cu(1)-N(8)#1 | 95.88(12) |
| Cu(1)-N(1)       | 1.990(3)  | N(3)-Cu(1)-N(1)    | 103.22(14) | N(1)-Cu(1)-N(8)#1 | 84.83(13) |
| Cu(1)-N(8)#1     | 2.433(3)  | N(2)-Cu(1)-N(1)    | 82.79(13)  | N(3)-Cu(1)-N(14)  | 95.39(17) |
| Cu(1)-N(14)      | 2.546(5)  | N(4)-Cu(1)-N(1)    | 174.20(13) | N(2)-Cu(1)-N(14)  | 87.07(16) |
| N(1)-Cu(1)-N(14) | 91.82(16) | N(8)#1-Cu(1)-N(14) | 175.07(14) | N(4)-Cu(1)-N(14)  | 87.10(16) |

Symmetry transformations used to generate equivalent atoms: #1 x,-y+1,z+1/2
